# Supplementary material
Source: PubMed Central journal article supplement (PMC8897538)
Supplement: 13613_2022_982_MOESM1_ESM.pdf [file 13613_2022_982_MOESM1_ESM.pdf]

## SUPPLEMENTAL INFORMATION

### **Recombinant human interleukin-7 reverses T cell exhaustion *ex vivo* in critically ill COVID-19 patients**

Frank Bidar<sup>1,2,3</sup>, Sarah Hamada<sup>3</sup>, Morgane Gossez<sup>3,4</sup>, Remy Coudereau<sup>1,3</sup>, Jonathan Lopez<sup>5</sup>, Marie-Angelique Cazalis<sup>1</sup>, Karen Brengel-Pesce<sup>1</sup>, Marine Mommert<sup>1</sup>, Marielle Buisson<sup>6</sup>, Filippo Conti<sup>1</sup>, Thomas Rimmelé<sup>1,2</sup>, Anne-Claire Lukaszewicz<sup>1,2</sup>, Laurent Argaud<sup>7</sup>, Martin Cour<sup>7</sup>, Guillaume Monneret<sup>1,3</sup>, Fabienne Venet<sup>1,4</sup> for the RICO study group

#### SUPPLEMENTAL TABLES

**Table S1. Significantly up- and down-regulated genes in COVID-19 patients at Day 0 compared with healthy volunteers.**

RNA extracted from PBMCs of COVID-19 patients at day 0 (n = 10) and healthy volunteers (n= 10) was analyzed through NanoString technology using the nCounter® PanCancer Immune Profiling Panel. Differentially expressed genes were determined based on Log<sub>2</sub> Fold Change ≤ -2 or ≥ +2 and -Log<sub>10</sub> P value ≥ 1.3.

| Gene                      | Log <sub>2</sub> Fold Change | - Log <sub>10</sub> P value |
|---------------------------|------------------------------|-----------------------------|
| FCER1A                    | -4,030136106                 | 2,7722232                   |
| MAGEC1                    | -2,990849995                 | 1,68029283                  |
| MAGEB2                    | -2,689119163                 | 1,40684639                  |
| IL13RA2                   | -2,670742456                 | 1,48848743                  |
| CT45A1                    | -2,670639343                 | 1,87594691                  |
| MAGEA12                   | -2,655671021                 | 1,36052205                  |
| MAGEC2                    | -2,548592408                 | 1,60612648                  |
| SSX1                      | -2,493230658                 | 1,59360809                  |
| SSX4                      | -2,363970242                 | 1,49859545                  |
| LRRN3                     | -2,173542243                 | 6,49294414                  |
| CLEC4C                    | -2,153950429                 | 1,63692438                  |
| MAGEA3                    | -2,09153476                  | 1,31786124                  |
| MX1                       | 2,01333371                   | 2,84970316                  |
| IFI35                     | 2,024585647                  | 6,17767815                  |
| KIR Inhibiting Subgroup 2 | 2,174014839                  | 2,47451132                  |
| MERTK                     | 2,394149577                  | 2,15285809                  |
| ITGA1                     | 2,494918032                  | 1,72412802                  |

|                           |             |            |
|---------------------------|-------------|------------|
| LAG3                      | 2,501075871 | 3,63041581 |
| S100A8                    | 2,558030351 | 2,08421554 |
| KIR Activating Subgroup 1 | 2,637419648 | 1,47096808 |
| IL10                      | 2,785818168 | 5,10873957 |
| TNFRSF13B                 | 2,847791006 | 1,4626652  |
| ITGA2B                    | 3,071505841 | 1,76670372 |
| CD9                       | 3,358146703 | 1,37578052 |
| C1R                       | 3,378535085 | 2,85497418 |
| IL1R2                     | 3,650076939 | 2,17992363 |
| ITGB3                     | 3,717991109 | 1,44031251 |
| CLEC5A                    | 4,558801643 | 1,44938719 |
| IFI27                     | 5,398161312 | 2,33778032 |

**Table S2. Significantly up- and down-regulated genes in COVID-19 patients at Day 20 compared with healthy volunteers.**

RNA extracted from PBMCs of COVID-19 patients at day 20 (n = 10) and healthy volunteers (n= 10) was analyzed through NanoString technology using the nCounter® PanCancer Immune Profiling Panel. Differentially expressed genes were determined based on Log2 Fold Change  $\leq -2$  or  $\geq +2$  and  $-\text{Log}_{10}$  P value  $\geq 1.3$ .

| <b>Genes</b> | <b>Log2 Fold Change</b> | <b>- Log10 Pvalue</b> |
|--------------|-------------------------|-----------------------|
| MAGEA12      | -3,73566265             | 1,53609544            |
| MAGEC1       | -3,564373226            | 1,77781345            |
| IL13RA2      | -3,563686769            | 1,65188203            |
| MAGEB2       | -3,352594519            | 1,52725952            |
| CT45A1       | -3,161525597            | 1,99292891            |
| SSX4         | -3,123372985            | 1,6883063             |
| MAGEC2       | -3,065943891            | 1,73224936            |
| SSX1         | -3,011822394            | 1,72352808            |
| SPANXB1      | -2,802842236            | 1,37306062            |
| MAGEA3       | -2,780736615            | 1,51785959            |
| MAGEA1       | -2,723373482            | 1,33353839            |
| IL1RAPL2     | -2,697516753            | 1,53077792            |
| SELE         | -2,468438816            | 1,65070709            |
| CD1E         | -2,455661163            | 1,4251441             |
| CCL22        | -2,454938616            | 1,50825996            |
| C3           | -2,42635283             | 1,41183176            |
| C8B          | -2,366968247            | 1,46491332            |
| IL2          | -2,351749839            | 1,67094432            |
| IFNA8        | -2,34265308             | 1,57008462            |
| CCL16        | -2,313595764            | 1,5315635             |
| CX3CL1       | -2,30863901             | 1,33968793            |
| IL22RA1      | -2,305036824            | 1,48951473            |
| KIR3DL3      | -2,289798317            | 1,35678979            |
| MST1R        | -2,28624901             | 1,47874847            |
| LRRN3        | -2,282762787            | 6,58817834            |
| C8A          | -2,265718073            | 1,54590641            |
| C1S          | -2,249822745            | 1,37611987            |
| LBP          | -2,239973536            | 1,55460694            |
| CCL18        | -2,231675818            | 1,56127954            |
| IL12B        | -2,206348593            | 1,45024769            |
| CD207        | -2,195184025            | 1,55451134            |
| CD209        | -2,187279839            | 1,46136254            |
| CCL13        | -2,186382688            | 1,51385032            |
| CCL27        | -2,153611966            | 1,33036022            |

|          |              |            |
|----------|--------------|------------|
| BID      | -2,150230303 | 1,45118973 |
| RAG1     | -2,14408087  | 1,42003853 |
| SEMG1    | -2,111716286 | 1,58265613 |
| DDX43    | -2,103242343 | 1,61920258 |
| IL21     | -2,082930504 | 1,46994919 |
| LILRA4   | -2,075710439 | 3,39552409 |
| IFNB1    | -2,056977301 | 1,49837503 |
| CCL8     | -2,037012026 | 1,58852413 |
| PRM1     | -2,023483901 | 1,50882999 |
| SPO11    | -2,022892719 | 1,39795826 |
| CCL1     | -2,005634    | 1,3862372  |
| A2M      | -2,000680886 | 1,35288527 |
| SBNO2    | 2,176608318  | 3,98902792 |
| S100A12  | 2,346749821  | 1,5745425  |
| LAG3     | 2,348068623  | 1,68870554 |
| S100A8   | 2,351324395  | 1,73769687 |
| PPBP     | 2,356841691  | 2,49152915 |
| MERTK    | 2,415646828  | 2,12143447 |
| ITGA1    | 2,737598798  | 2,46431782 |
| ITGA2B   | 2,836680704  | 3,19584199 |
| CD9      | 3,120203313  | 2,43607764 |
| SERPINB2 | 3,137942192  | 1,33439115 |
| ITGB3    | 3,269622192  | 3,15632818 |
| C1R      | 3,29181307   | 2,67281122 |

**Table S3. Canonical pathways differentially expressed between COVID-19 patients at Day 0 or Day 20 and healthy volunteers**

RNA extracted from PBMCs of COVID-19 patients at day 0 and day 20 (n = 10) and healthy volunteers (HV, n= 10) were analyzed through NanoString technology using the nCounter® PanCancer Immune Profiling Panel. List of differentially expressed genes were determined after normalization based on Log2 Fold Change  $\leq -2$  or  $\geq +2$  and  $-\text{Log}_{10}$  P value  $\geq 1.3$ . Significantly enriched canonical pathways were subsequently identified through Ingenuity Pathways Analysis. Corresponding Z-score and  $-\text{log}_{10}$  p values are reported.

| Pathways                                                     | Z Score (Day 0) | Log10 P value (Day 0) | Z Score (Day 20) | Log10 P value (Day 20) |
|--------------------------------------------------------------|-----------------|-----------------------|------------------|------------------------|
| IL-23 Signaling Pathway                                      | -0,447          | 5,63                  | -0,707           | 11,00                  |
| IL-17 Signaling                                              | -0,905          | 8,86                  | -1,807           | 11,90                  |
| IL-15 Signaling                                              | 2,236           | 4,52                  | 0,447            | 5,03                   |
| IL-15 Production                                             | 1,342           | 3,56                  | 0,302            | 10,70                  |
| T Cell Receptor Signaling                                    | 0,447           | 0,84                  | -0,302           | 3,39                   |
| Th17 Activation Pathway                                      | -0,277          | 6,59                  | -0,277           | 6,58                   |
| Th2 Pathway                                                  | -1,667          | 11,7                  | -1,508           | 11,40                  |
| Th1 Pathway                                                  | -0,447          | 6,95                  | -1,667           | 9,44                   |
| Activation of IRF by Cytosolic Pattern Recognition Receptors | 0,378           | 7,66                  | -2,333           | 11,00                  |
| Acute Phase Response Signaling                               | 0,447           | 4,56                  | -0,333           | 9,69                   |
| B Cell Receptor Signaling                                    | 2               | 1,85                  | 1                | 3,56                   |
| Breast Cancer Regulation by Stathmin1                        | -0,632          | 3,33                  | -0,816           | 0,76                   |
| Colorectal Cancer Metastasis Signaling                       | 1,89            | 3,52                  | -0,333           | 5,01                   |
| Crosstalk between Dendritic Cells and Natural Killer Cells   | 1,633           | 6,61                  | -2,111           | 15,20                  |
| Dendritic Cell Maturation                                    | -0,333          | 2,87                  | -1,886           | 8,46                   |
| Erythropoietin Signaling Pathway                             | 1,897           | 7,84                  | 2,111            | 8,69                   |
| Estrogen Receptor Signaling                                  | 2               | 0,91                  | 1,342            | 1,35                   |
| Hepatic Fibrosis Signaling Pathway                           | 0,333           | 6,11                  | 0,277            | 9,59                   |
| HER-2 Signaling in Breast Cancer                             | 1,134           | 4,41                  | 1,508            | 7,29                   |
| IL-8 Signaling                                               | 2,236           | 3,29                  | 1,667            | 5,95                   |
| ILK Signaling                                                | 1               | 1,84                  | 0,447            | 2,77                   |
| iNOS Signaling                                               | 2               | 5,45                  | 2                | 9,06                   |
| Integrin Signaling                                           | 2,236           | 2,48                  | 2,121            | 4,18                   |
| Interferon Signaling                                         | 1,89            | 9,54                  | -0,816           | 7,03                   |
| LPS/IL-1 Mediated Inhibition of RXR Function                 | -0,447          | 2,89                  | -1               | 1,63                   |
| LXR/RXR Activation                                           | -0,333          | 7,99                  | -0,333           | 8,00                   |
| MSP-ROn Signaling In Macrophages Pathway                     | 1,134           | 5,82                  | 0,707            | 7,15                   |
| Natural Killer Cell Signaling                                | 1,89            | 4,32                  | 0,832            | 10,30                  |
| Neuroinflammation Signaling Pathway                          | 1,508           | 7,33                  | -1,606           | 14,60                  |

|                                                                               |        |      |        |       |
|-------------------------------------------------------------------------------|--------|------|--------|-------|
| NF-kB Signaling                                                               | 0,632  | 3,61 | -0,302 | 3,14  |
| p38 MAPK Signaling                                                            | -0,447 | 4,72 | -0,816 | 6,08  |
| PPARa/RXRa Activation                                                         | -0,447 | 2,63 | 0      | 2,07  |
| Production of Nitric Oxide and Reactive Oxygen Species in Macrophages         | 2      | 1,87 | 0,378  | 5,34  |
| Regulation Of The Epithelial Mesenchymal Transition By Growth Factors Pathway | 1,134  | 4,48 | 0,378  | 4,52  |
| Role of Hypercytokinemia/hyperchemokemia in the Pathogenesis of Influenza     | 1,265  | 11   | -3,207 | 15,50 |
| Role of NFAT in Regulation of the Immune Response                             | 1      | 0,89 | 0,707  | 1,98  |
| Role of Pattern Recognition Receptors in Recognition of Bacteria and Viruses  | 1,89   | 15,2 | -2,111 | 18,50 |
| Role of RIG1-like Receptors in Antiviral Innate Immunity                      | 0,447  | 5,63 | -1,89  | 9,36  |
| Semaphorin Neuronal Repulsive Signaling Pathway                               | -2     | 3,12 | -1,633 | 5,23  |
| STAT3 Pathway                                                                 | 1      | 5,46 | -0,816 | 7,80  |
| Systemic Lupus Erythematosus In B Cell Signaling Pathway                      | 0,775  | 11,4 | -3,128 | 19,60 |
| Systemic Lupus Erythematosus In T Cell Signaling Pathway                      | 0,302  | 3,8  | -0,333 | 1,76  |
| Toll-like Receptor Signaling                                                  | 0,447  | 9,94 | -1,134 | 16,10 |
| TREM1 Signaling                                                               | 0,447  | 4,49 | -0,378 | 7,48  |
| Tumor Microenvironment Pathway                                                | 0,816  | 3,6  | 1,134  | 5,51  |

**Table S4. Immune parameters in patients with or without concomitant bacterial infections at D0 and D20.**

Results were compared between patients with or without concomitant bacterial infection at D0 (n = 9 co-infected patients vs 11 with only SARS-CoV-2 infection) and between patients with ICU-acquired infection before D20 (n = 15) vs patients with no secondary infections (n = 5). Comparisons between groups were made using non parametric Mann-Whitney U tests.

| <b>At D0</b>                                        | <b>bacterial co-infection:<br/>NO</b> | <b>bacterial co-infection:<br/>YES</b> | <b>p-value</b> |
|-----------------------------------------------------|---------------------------------------|----------------------------------------|----------------|
| IFN- $\gamma$ production (IU/mL)                    | 14.02<br>[10.91 – 33.98]              | 17.10<br>[8.55 – 31.76]                | 0.831          |
| T cell proliferation (% Edu+ CD3+ T cells)          | 19.68<br>[18.47 – 20.72]              | 14.42<br>[11.51 – 22.95]               | 0.286          |
| PD-1 expression on CD4+ T cells (% positive cells)  | 12.03<br>[8.13 – 14.61]               | 28.06<br>[22.98 – 28.11]               | <b>0.012</b>   |
| PD-1 expression on CD8+ T cells (% positive cells)  | 12.21<br>[11.43 – 17.64]              | 25.22<br>[23.22 – 36.23]               | <b>0.042</b>   |
| PD-L1 expression on CD4+ T cells (% positive cells) | 1.4<br>[0.24 – 3.01]                  | 3.59<br>[2.00 – 6.42]                  | 0.167          |
| PD-L1 expression on CD8+ T cells (% positive cells) | 2.18<br>[1.89 – 3.17]                 | 12.57<br>[6.96 – 13.65]                | <b>0.019</b>   |
| CTLA4 expression on CD4+ T cells (% positive cells) | 0.16<br>[0.10 – 1.49]                 | 3.28<br>[2.24 – 4.57]                  | <b>0.019</b>   |
| CTLA4 expression on CD8+ T cells (% positive cells) | 0.53<br>[0.30 – 2.60]                 | 3.06<br>[2.70 – 4.68]                  | 0.088          |
| TIM3 expression on CD4+ T cells (% positive cells)  | 1.13<br>[0.52 – 4.19]                 | 3.96<br>[3.90 – 4.91]                  | 0.123          |
| TIM3 expression on CD8+ T cells (% positive cells)  | 4.24<br>[1.77 – 7.28]                 | 8.38<br>[7.30 – 10.40]                 | 0.167          |
| <b>At D20</b>                                       | <b>bacterial co-infection:<br/>NO</b> | <b>bacterial co-infection:<br/>YES</b> | <b>p-value</b> |
| IFN- $\gamma$ production (IU/mL)                    | 399.50<br>[306.88 – 913.00]           | 206.00<br>[167.38 – 487.62]            | 0.439          |
| T cell proliferation (% Edu+ CD3+ T cells)          | 18.11<br>[15.36 – 19.39]              | 26.70<br>[15.93 – 40.78]               | 0.439          |
| PD-1 expression on CD4+ T cells (% positive cells)  | 10.14<br>[7.01 – 16.25]               | 23.74<br>[17.63 – 26.36]               | 0.079          |
| PD-1 expression on CD8+ T cells (% positive cells)  | 34.26<br>[21.27 – 34.42]              | 26.62<br>[18.63 – 50.98]               | 0.518          |
| PD-L1 expression on CD4+ T cells (% positive cells) | 0.03<br>[0.03 – 2.39]                 | 1.54<br>[1.37 – 2.58]                  | 0.405          |
| PD-L1 expression on CD8+ T cells (% positive cells) | 1.04<br>[0.73 – 8.61]                 | 4.42<br>[3.90 – 8.73]                  | 0.309          |
| CTLA4 expression on CD4+ T cells (% positive cells) | 0.09<br>[0.07 – 1.39]                 | 1.97<br>[1.52 – 3.00]                  | 0.166          |
| CTLA4 expression on CD8+ T cells (% positive cells) | 0.28<br>[0.23 – 2.21]                 | 2.97<br>[2.03 – 3.21]                  | 0.229          |
| TIM3 expression on CD4+ T cells (% positive cells)  | 0.40<br>[0.30 – 6.72]                 | 3.39<br>[2.38 – 6.89]                  | 0.518          |
| TIM3 expression on CD8+ T cells                     | 1.91                                  | 7.27                                   | 0.518          |

|                    |                |                |  |
|--------------------|----------------|----------------|--|
| (% positive cells) | [1.26 – 14.87] | [5.25 – 10.62] |  |
|--------------------|----------------|----------------|--|
